# Supplementary material
Source: publisher site journal article supplement (https://www.dovepress.com/article/218747)
Supplement: Supplementary file 1 [file get_supplementary_file.php]

**Supplementary Table 1. Baseline characteristics by treatment group**

|                                 | All<br>(n = 561) | No treatment<br>(n = 60) | As-needed<br>(n = 32) | LABA <sup>a</sup><br>(n = 8) | LAMA<br>(n = 85) | LABA+LAMA<br>(n = 22) | ICS<br>(n = 23) | ICS+LABA<br>(n = 57) | ICS+LAMA<br>(n = 18) | ICS+LABA+<br>LAMA (n = 256) |
|---------------------------------|------------------|--------------------------|-----------------------|------------------------------|------------------|-----------------------|-----------------|----------------------|----------------------|-----------------------------|
| Demographics                    |                  |                          |                       |                              |                  |                       |                 |                      |                      |                             |
| Female, n (%)                   | 327 (58%)        | 28 (47%)                 | 15 (47%)              | 6 (75%)                      | 45 (53%)         | 13 (59%)              | 14 (61%)        | 33 (58%)             | 10 (56%)             | 163 (64%)                   |
| Age, mean (SD)                  | 69 (8)           | 69 (8)                   | 69 (8)                | 69 (8)                       | 69 (7)           | 67 (7)                | 67 (8)          | 68 (9)               | 69 (9)               | 69 (8)                      |
| BMI < 22                        | 82 (15%)         | 11 (18%)                 | 2 (6%)                | 1 (13%)                      | 11 (13%)         | 3 (14%)               | 3 (13%)         | 5 (9%)               | 2 (11%)              | 44 (17%)                    |
| BMI 22 – 30                     | 346 (62%)        | 38 (63%)                 | 22 (69%)              | 5 (63%)                      | 52(61%)          | 15 (68%)              | 17 (74%)        | 33 (58%)             | 13 (72%)             | 151 (59%)                   |
| BMI > 30                        | 130 (23%)        | 11 (18%)                 | 8 (25%)               | 2 (25%)                      | 22 (26%)         | 4 (18%)               | 3 (13%)         | 19 (33%)             | 3 (17%)              | 58 (23%)                    |
| Smoking status, n (%)           |                  |                          |                       |                              |                  |                       |                 |                      |                      |                             |
| Never smokers                   | 9 (2%)           | 1 (2%)                   | 0 (0%)                | 0 (0%)                       | 1 (1%)           | 0 (0%)                | 0 (0%)          | 1 (2%)               | 1 (6%)               | 5 (2%)                      |
| Ex-smokers                      | 389 (69%)        | 30 (50%)                 | 22 (69%)              | 7 (88%)                      | 55 (65%)         | 15 (68%)              | 14 (61%)        | 44 (77%)             | 12 (67%)             | 190 (74%)                   |
| Current smokers                 | 162 (29%)        | 29 (48%)                 | 10 (31%)              | 1 (13%)                      | 29 (35%)         | 7 (32%)               | 9 (39%)         | 12 (21%)             | 5 (28%)              | 60 (23%)                    |
| Lung function, mean (SD)        |                  |                          |                       |                              |                  |                       |                 |                      |                      |                             |
| FEV <sub>1</sub> %<br>predicted | 57 (18)          | 69 (13)                  | 70 (14)               | 63 (23)                      | 61 (15)          | 62 (12)               | 70 (15)         | 57 (16)              | 66 (15)              | 48 (17)                     |
| Inflammatory markers, n (%)     |                  |                          |                       |                              |                  |                       |                 |                      |                      |                             |
| B-Eos > 400<br>cells/ $\mu$ L   | 39 (7%)          | 2 (3%)                   | 3 (9%)                | 0 (0%)                       | 7 (8%)           | 0 (0%)                | 4 (17%)         | 6 (11%)              | 0 (0%)               | 17 (7%)                     |
| Comorbidity, n (%)              |                  |                          |                       |                              |                  |                       |                 |                      |                      |                             |
| Asthma                          | 189 (34%)        | 6 (10%)                  | 10 (31%)              | 1 (13%)                      | 16 (19%)         | 4 (18%)               | 12 (52%)        | 30 (53%)             | 8 (44%)              | 102 (40%)                   |
| Symptoms, n (%)                 |                  |                          |                       |                              |                  |                       |                 |                      |                      |                             |
| CAT $\geq$ 10                   | 346 (62%)        | 23 (38%)                 | 14 (44%)              | 1 (13%)                      | 52 (61%)         | 14 (64%)              | 10 (43%)        | 32 (56%)             | 12 (67%)             | 188 (73%)                   |
| mMRC $\geq$ 2                   | 247 (44%)        | 11 (18%)                 | 11 (34%)              | 3 (38%)                      | 28 (33%)         | 11 (50%)              | 4 (17%)         | 24 (42%)             | 7 (39%)              | 148 (58%)                   |
| Exacerbations, n (%)            |                  |                          |                       |                              |                  |                       |                 |                      |                      |                             |
| Frequent                        | 107 (19%)        | 4 (7%)                   | 0 (0%)                | 0 (0%)                       | 2 (2%)           | 1 (5%)                | 1 (4%)          | 7 (12%)              | 2 (11%)              | 90 (35%)                    |
| Level of care, n (%)            |                  |                          |                       |                              |                  |                       |                 |                      |                      |                             |
| Secondary care                  | 82 (15%)         | 0 (0%)                   | 0 (0%)                | 0 (0%)                       | 3 (4%)           | 1 (5%)                | 0 (0%)          | 8 (14%)              | 0 (0%)               | 70 (27%)                    |

**Notes:** Categorical variables given as n (%), continuous variables given as mean (SD). <sup>a</sup>Two patients with SABA as maintenance treatment included in this group.

**Abbreviations:** B-Eos, blood eosinophils; BMI, body mass index; CAT, COPD Assessment Test; FEV<sub>1</sub>, forced expiratory volume in 1 second; Frequent exacerbations,  $\geq$  2 exacerbations treated in primary care or at emergency room and/or  $\geq$  1 hospital admission during the year before study inclusion; ICS, inhaled corticosteroid; LABA, long-acting beta-2-agonist; LAMA, long-acting muscarinic antagonist; mMRC, modified Medical Research Council.

## Supplementary Figure 1.

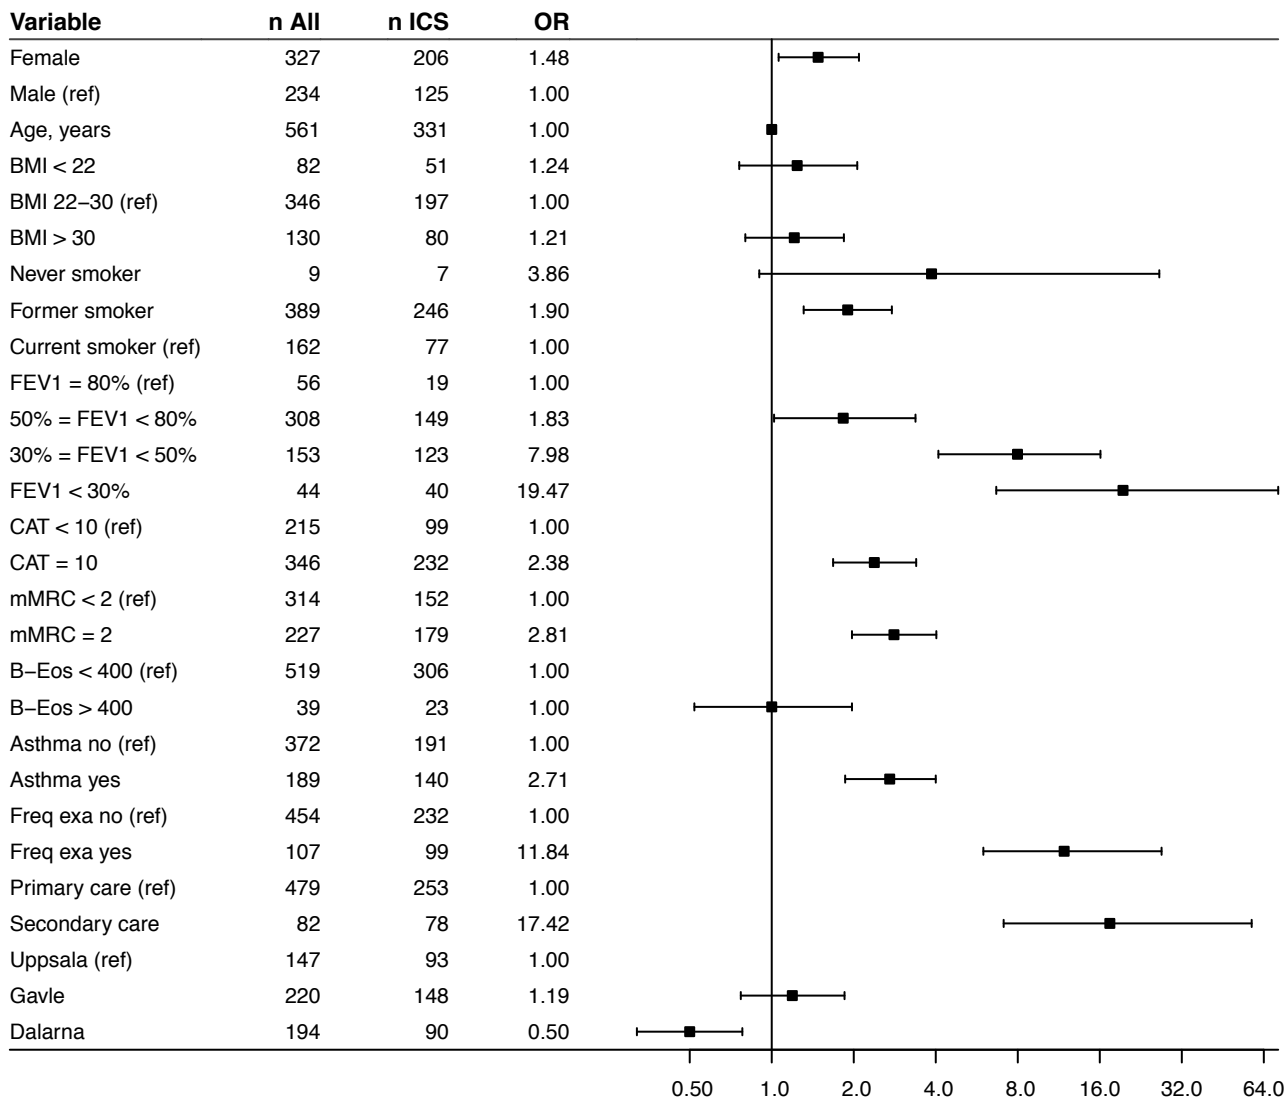

Odds ratios with 95% CIs for association with COPD treatment including ICS in combination with LABA and/or LAMA in a simple logistic regression analyses

Abbreviations: B-Eos, blood eosinophil; CAT, COPD Assessment Test; CI, confidence interval; COPD, chronic obstructive pulmonary disease; FEV1, forced expiratory volume in 1 second; Freq exa, frequent exacerbations,  $\geq 2$  exacerbations treated in primary care or at emergency room and/or  $\geq 1$  hospital admissions during the previous year due to worsening in COPD; ICS, inhaled corticosteroid; LABA, long-acting beta-2-agonist; LAMA, long-acting muscarinic antagonist; mMRC, modified Medical Research Council; OR, odds ratio
